# Supplementary material for: Neural Basis of Psychological Growth following Adverse Experiences: A Resting-State Functional MRI Study
Source: PubMed Central journal article supplement (PMC4546237; doi:10.1371/journal.pone.0136427), 2015-08-20
Supplement: pone.0136427.s001.pdf [file pone.0136427.s001.pdf]

| ID | Sex | Hand | Age | Event type | PTGI | IES-R | BDI | Head Movement | Left rPFC | Left SPL | Left SMG |
|----|-----|------|-----|------------|------|-------|-----|---------------|-----------|----------|----------|
| 1  | 0   | 1    | 21  | 1          | 66   | 37    | 7   | 0             | -1.0959   | -0.1891  | 0.5222   |
| 2  | 0   | 1    | 21  | 4          | 110  | 1     | 3   | 0             | 1.2154    | 1.35     | 0.3454   |
| 3  | 0   | 1    | 26  | 7          | 46   | 1     | 5   | 0             | 0.8657    | -2.0229  | 0.1217   |
| 4  | 1   | 1    | 24  | 8          | 114  | 0     | 0   | 0             | 1.6667    | 0.511    | 0.3937   |
| 5  | 0   | 1    | 27  | 8          | 46   | 21    | 9   | 0             | -1.1959   | 0.3004   | 0.3985   |
| 6  | 1   | 1    | 48  | 5          | 72   | 5     | 6   | 1             |           |          |          |
| 7  | 0   | 1    | 33  | 6          | 49   | 0     | 0   | 0             | -1.05     | -0.5428  | 0.1196   |
| 8  | 1   | 1    | 23  | 7          | 77   | 41    | 11  | 0             | 1.4609    | -0.4813  | 0.1564   |
| 9  | 1   | 1    | 21  | 7          | 86   | 4     | 1   | 0             | 0.5641    | 1.733    | 0.2702   |
| 10 | 0   | 1    | 20  | 7          | 76   | 8     | 0   | 0             | -2.0146   | 0.6143   | 0.1185   |
| 11 | 0   | 1    | 28  | 4          | 47   | 26    | 7   | 0             | -1.8352   | -1.0675  | 0.2784   |
| 12 | 0   | 1    | 19  | 7          | 56   | 25    | 6   | 0             | 1.2981    | 0.6877   | -0.0895  |
| 13 | 1   | 1    | 18  | 6          | 56   | 22    | 12  | 0             | -3.0165   | -2.8169  | 0.1736   |
| 14 | 1   | 1    | 21  | 4          | 50   | 6     | 4   | 0             | -1.18     | 0.0673   | -0.0108  |
| 15 | 0   | 1    | 20  | 7          | 80   | 18    | 5   | 0             | -0.8808   | -0.248   | 0.3747   |
| 16 | 0   | 1    | 21  | 6          | 46   | 17    | 19  | 0             | -1.9294   | -1.6074  | -0.0782  |
| 17 | 0   | 1    | 18  | 1          | 103  | 7     | 0   | 0             | 0.832     | 1.6945   | 0.7078   |
| 18 | 0   | 1    | 24  | 6          | 81   | 5     | 6   | 1             |           |          |          |
| 19 | 1   | 1    | 21  | 7          | 94   | 32    | 5   | 0             | 3.1413    | 1.7146   | 0.38     |
| 20 | 0   | 1    | 19  | 4          | 89   | 26    | 12  | 0             | 0.9899    | 0.4977   | 0.4604   |
| 21 | 0   | 1    | 18  | 7          | 76   | 10    | 6   | 0             | 2.4321    | -0.5076  | 0.1151   |
| 22 | 0   | 1    | 18  | 6          | 77   | 13    | 6   | 0             | 0.0769    | 1.0788   | 0.2115   |
| 23 | 1   | 1    | 19  | 4          | 92   | 4     | 0   | 1             |           |          |          |
| 24 | 1   | 1    | 20  | 1          | 79   | 26    | 5   | 0             | 0.5005    | 0.4624   | 0.0244   |
| 25 | 0   | 1    | 20  | 4          | 37   | 8     | 4   | 0             | -2.0095   | -1.3347  | -0.1693  |
| 26 | 0   | 1    | 18  | 3          | 105  | 8     | 1   | 0             | 3.0371    | 2.5195   | 0.5924   |
| 27 | 0   | 1    | 21  | 7          | 42   | 0     | 0   | 0             | 0.1275    | -2.9889  | 0.0993   |
| 28 | 0   | 1    | 20  | 8          | 82   | 4     | 0   | 0             | 0.3977    | 0.6479   | 0.2074   |
| 29 | 1   | 1    | 20  | 4          | 63   | 2     | 0   | 0             | -0.6981   | -1.0031  | -0.1605  |
| 30 | 0   | 1    | 25  | 1          | 81   | 5     | 3   | 0             | -0.321    | 0.0612   | 0.0371   |
| 31 | 0   | 1    | 22  | 1          | 66   | 5     | 6   | 0             | 0.4013    | 0.4567   | 0.0672   |
| 32 | 1   | 1    | 21  | 6          | 41   | 37    | 17  | 0             | -0.2644   | 0.0596   | 0.0854   |
| 33 | 1   | 1    | 21  | 7          | 52   | 47    | 9   | 0             | -1.5158   | 0.3537   | -0.1061  |
